# Supplementary material for: TREM2-Transduced Myeloid Precursors Mediate Nervous Tissue Debris Clearance and Facilitate Recovery in an Animal Model of Multiple Sclerosis
Source: PLOS journal article supplement (doi:10.1371/journal.pmed.0040124), 2007-04-04
Supplement: S3 (10.1371/journal.pmed.0040124.s003) [file journal.pmed.0040124.s003]

**Oligonucleotide sequences used in this study**

Gene name Accession no. Oligonucleotide sequences for RT-PCR

GAPDH NM_008084 forward: 5’–AACTTTGGCATTGTGGAAGG–3’

reverse: 5’–ACACATTGGGGGTAGGAACA–3’

TREM2 NM_011662 forward: 5’–ATGGGACCTCTCCACCAGTT–3’

reverse: 5’–TCACGTACCTCCGGGTCCA–3’

DAP12 NM_011662 forward: 5’–ATGGGGGCTCTGGAGCCCT–3’

reverse: 5’–TCATCTGTAATATTGCCTCTGTGT

Gene name Accession no. Oligonucleotide sequences for real-time RT-PCR

GAPDH NM_008084 forward: 5’–CTCCACTCACGGCAAATTCAA–3’

reverse: 5’–GATGACAAGCTTCCCATTCTCG–3’

TNF NM_013693 forward: 5’–CCGTCAGCCGATTTGCTATCT–3’

reverse: 5’–ACGGCAGAGAGGAGGTTGACTT–3’

IL-1 NM_008361 forward: 5’–ACAACAAAAAAGCCTCGTGCTG–3’

reverse: 5’–CCATTGAGGTGGAGAGCTTTCA–3’

NOS2 NM_010927 forward: 5’–GGCAAACCCAAGGTCTACGTTC–3’

reverse: 5’–TACCTCATTGGCCAGCTGCTT–3’

TGF1 NM_011577 forward: 5’–AGGACCTGGGTTGGAAGTGG–3’

reverse: 5’–AGTTGGCATGGTAGCCCTTG–3’

IL-10 NM_010548 forward: 5’–AGGCGCTGTCATCGATTTCTC–3’

reverse: 5’–TGCTCCACTGCCTTGCTCTTA–3’

IFN NM_008337 forward: 5’–TGCATCTTGGCTTTGCAGC–3’

reverse: 5’–GGCAGTAACAGCCAGAAACAGC–3’

IL-12p40 NM_008352 forward: 5’–TCACACTGGACCAAAGGGACT–3’

reverse: 5’–CCTCCTGGCAGGACACTGAA–3’

IL-12p35 NM_008351 forward: 5’–AAATGAAGCTCTGCATCCTGC–3’

reverse: 5’–TCACCCTGTTGATGGTCACG–3’

IL-2 NM_008366 forward: 5’–GTCAACAGCGCACCCACTT–3’

reverse: 5’–TGCTTCCGCTGTAGAGCTTG–3’

IL-4 NM_021283 forward: 5’–CACGGATGCGACAAAAATCA–3’

reverse: 5’–CTCGTTCAAAATGCCGATGA–3’

BDNF NM_007540 forward: 5’–AGGCACTGGAACTCGCAATG–3’

reverse: 5’–AAGGGCCCGAACATACGATT–3’

NT3 NM_008742 forward: 5’–TCCTCAGCCATTGACATTCG–3’

reverse: 5’–GATCTCCCCCAGCACTGTGA–3’

GDNF NM_010275 forward: 5’–GGGTGCGTTTTAACTGCCAT–3’

reverse: 5’–GCCCAAACCCAAGTCAGTGA–3’
